# Supplementary material for: Establishment of the Primary Avian Gonadal Somatic Cell Lines for Cytogenetic Studies
Source: MDPI journal article supplement (doi:10.3390/ani12131724), 2022-07-04
Supplement: s1 [file s1]

## Supplementary Material

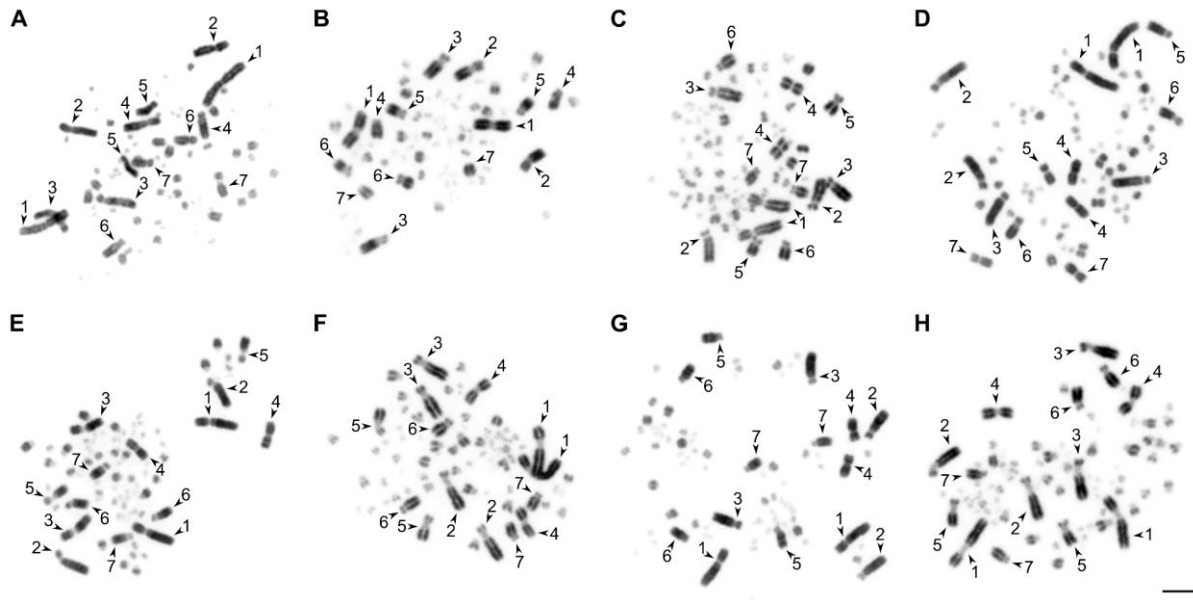

**Figure S1.** The examples of metaphase chromosome plates prepared from the short term testicular cell cultures of zebra finch (A), Gouldian finch (B), common chaffinch (C), brambling (D), European greenfinch (E), domestic canary (F), European goldfinch (G) and common linnet (H). The arrowheads indicate the seven largest macrochromosomes. Bar – 5  $\mu\text{m}$ .

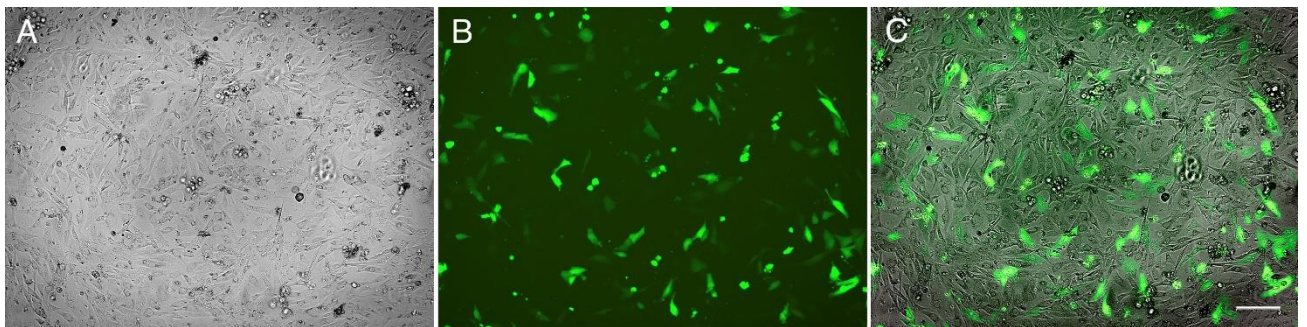

**Figure S2.** The OFC1A cell culture electroporated by plasmid with GFP. A - phase contrast image, B - GFP, C - merged image. Bar - 100  $\mu\text{m}$ .

**Table S1.** Sources of the birds examined

| Scientific name                        | Common name         | No of specimens   | Source                              |
|----------------------------------------|---------------------|-------------------|-------------------------------------|
| <i>Parus major</i>                     | Great tit           | 4 females, 1 male | Trapped in Novosibirsk              |
| <i>Bathilda ruficauda</i>              | Starfinch           | 1 male            | Purchased from a commercial breeder |
| <i>Taeniopygia guttata</i>             | Zebra finch         | 1 male            | Purchased from a commercial breeder |
| <i>Chloebia gouldiae</i>               | Gouldian finch      | 1 male            | Purchased from a commercial breeder |
| <i>Fringilla coelebs</i>               | Common chaffinch    | 1 male            | Trapped in Novosibirsk              |
| <i>Fringilla montifringilla</i>        | Brambling           | 1 male            | Trapped in Novosibirsk              |
| <i>Chloris chloris</i>                 | European greenfinch | 1 male            | Trapped in Novosibirsk              |
| <i>Serinus canaria forma domestica</i> | Domestic canary     | 1 male            | Purchased from a commercial breeder |
| <i>Carduelis carduelis</i>             | European goldfinch  | 1 male            | Trapped in Novosibirsk              |
| <i>Linaria cannabina</i>               | Common linnet       | 1 male            | Trapped in Novosibirsk              |

**Table S2.** Primer sequences used for RT-PCR Analysis

| Gene           | Sequence (5'–3')        |                      | Product size(bp) |
|----------------|-------------------------|----------------------|------------------|
|                | Sense                   | Antisense            |                  |
| VIM            | TAGTTGGCGAAGCGGTCATT    | GACTCGGTGGACTTCACCTT | 107              |
| ALCAM          | ACCAGACTACAAAGACAGGTTGA | GACTATCGTCGGCTCTTCGG | 136              |
| POSTN          | CTCCAGACCCTTTGCCAGTT    | CTCCCCTCGGAAGTCTCTCA | 918              |
| DCN            | AGGTGCCAAAAGACCTTCCC    | TGCCAAGTTGGTGAGTCCAG | 524              |
| OSR1           | GGAGCAGTGGGCTCCAATTT    | CCGCTAGTGTTCTGGACTGG | 838              |
| FOXL2          | TGGGAGCATGACAGCAAACA    | TACACTGACACTACACGCGG | 234              |
| $\beta$ -actin | CTCGAAATCCAGGGCGACAT    | CTCATGCCATCCTCCGTCTG | 158              |
